# Supplementary material for: Embryonic POU5F1 is Required for Expanded Bovine Blastocyst Formation
Source: PubMed Central journal article supplement (PMC5958112; doi:10.1038/s41598-018-25964-x), 2018-05-17
Supplement: 41598_2018_25964_MOESM1_ESM.pdf [file 41598_2018_25964_MOESM1_ESM.pdf]

## Supplementary Information

**Title:** Embryonic POU5F1 is Required for Expanded Bovine Blastocyst Formation

Bradford W. Daigneault<sup>1†</sup>, Sandeep Rajput<sup>1</sup>, George W. Smith<sup>1</sup>, Pablo J. Ross<sup>2\*</sup>

**Supplementary Table S1. Phenotype and genotype evaluation of IVF-produced embryos**

| Experimental group | <u>Immunofluorescence</u> |          | <u>Sequence</u> | Total N |
|--------------------|---------------------------|----------|-----------------|---------|
|                    | POU5F1 +                  | POU5F1 - | Genotype        |         |
| Un-injected Ctrl   | 8                         | 0        | WT              | 8       |
| POU5F1 E1 Ctrl     | 3                         | 0        | WT              | 3       |
| POU5F1 TKO         | --                        | 3        | Mutated         | 3       |
| POU5F1 TKO         | 2                         | --       | WT              | 2       |

Day 7.5 embryos produced from *in vitro* fertilization with frozen-thawed bull sperm were fixed with 4% paraformaldehyde and subjected to immunohistochemistry to detect the presence or absence of POU5F1. A subset of embryos from control and targeted-knockout groups was sequenced to confirm that the genotype was consistent with POU5F1 expression.
